# Supplementary material for: High-Affinity Bent β2-Integrin Molecules in Arresting Neutrophils Face Each Other through Binding to ICAMs In cis
Source: PubMed Central journal article supplement — Cell Rep. Author manuscript; Available in PMC 2019 Jul 12. (PMC6625519; doi:10.1016/j.celrep.2018.12.038), 2019-01-02
Supplement: NIHMS1517861-supplement-1.pdf [file NIHMS1517861-supplement-1.pdf]

Cell Reports, Volume 26

## Supplemental Information

### **High-Affinity Bent $\beta_2$ -Integrin Molecules in Arresting Neutrophils Face Each Other through Binding to ICAMs In *cis***

**Zhichao Fan, William Bill Kiosses, Hao Sun, Marco Orecchioni, Yanal Ghosheh, Dirk M. Zajonc, M. Amin Arnaout, Edgar Gutierrez, Alex Groisman, Mark H. Ginsberg, and Klaus Ley**

1 **Supplemental Figures:**

2

3 **Figure S1**

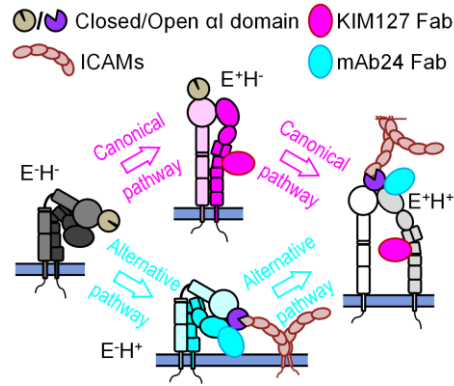

4

5

6 **Figure S1. Two activation pathways and four conformations of  $\beta_2$  integrins, Related to**

7 **Figure 7**

8 KIM127 (magenta) can specifically detect integrin extension ( $E^+$ ) and mAb24 (cyan) can

9 specifically detect headpiece-opening ( $H^+$ ). Switchblade pathway:  $E^-H^-$  (KIM127 $^-$ mAb24 $^-$ )  $\rightarrow$

10  $E^+H^-(KIM127^+mAb24^-) \rightarrow E^+H^+(KIM127^+mAb24^+)$ ; Alternative pathway (Fan et al., 2016):

11  $E^-H^-$  (KIM127 $^-$ mAb24 $^-$ )  $\rightarrow E^-H^+(mAb24^+KIM127^-) \rightarrow E^+H^+(KIM127^+mAb24^+)$ <sup>8</sup>.

12

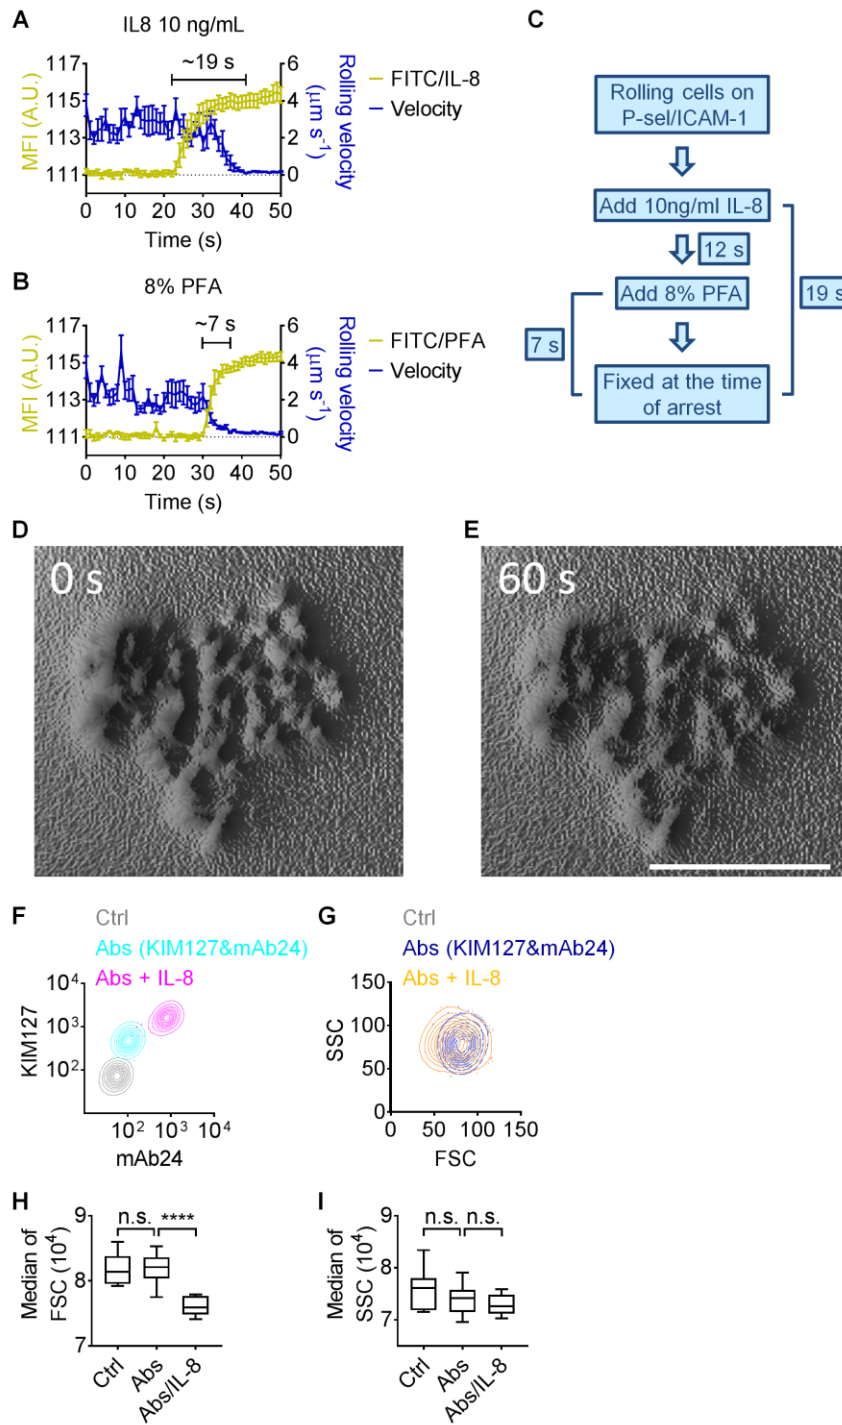

16 **Figure S2. Fixing neutrophils at the time of arrest, Related to Figure 1**

17 (A-B) Primary human neutrophils were allowed to roll on coverslips coated with P-selectin (2  
18  $\mu\text{g/ml}$ ) and ICAM-1 (10  $\mu\text{g/ml}$ ) at a wall shear stress of 6  $\text{dyn/cm}^2$ . Then IL-8 (10  $\text{ng/ml}$ , A) or  
19 PFA (8%, B) was perfused and the rolling velocity was monitored (blue curves) to identify the  
20 arrest or fixation, respectively. FITC was perfused together to monitor the arrival of IL-8 or PFA  
21 (yellow curves). IL-8 takes  $\sim 19$  seconds to arrest neutrophils. PFA takes  $\sim 7$ s to fix neutrophils.  
22 Mean  $\pm$ SD, n=10 (C) To fix neutrophils at the time of arrest, PFA was added 12s after IL-8. (D-E)  
23 Top-view 3D topography of neutrophil footprint before (D) and sixty seconds after (E) fixation  
24 in 8% PFA. The cell membrane was identified by the labeling of GPI-anchored protein CD16  
25 (AF488 conjugated antibody, clone 3G8) on neutrophils. Microvilli were identified as hills in the  
26 topography. (F-I) IL-8 stimulation but not antibody incubation affects the phenotype of  
27 neutrophils. Changes of KIM127/mAb24 MFI (F) and FSC/SSC (G) before (grey) and after  
28 adding antibodies (cyan in F, blue in G) and IL-8 (magenta in F, orange in G) were shown as  
29 contour plots. Medians of FSC (H) and SSC (I) of neutrophils before and after adding antibodies  
30 and IL-8 from five independent experiments were shown. n.s.  $P > 0.05$ , \*\*\*\* $p < 0.0001$  by  
31 one-way ANOVA test.

32

33

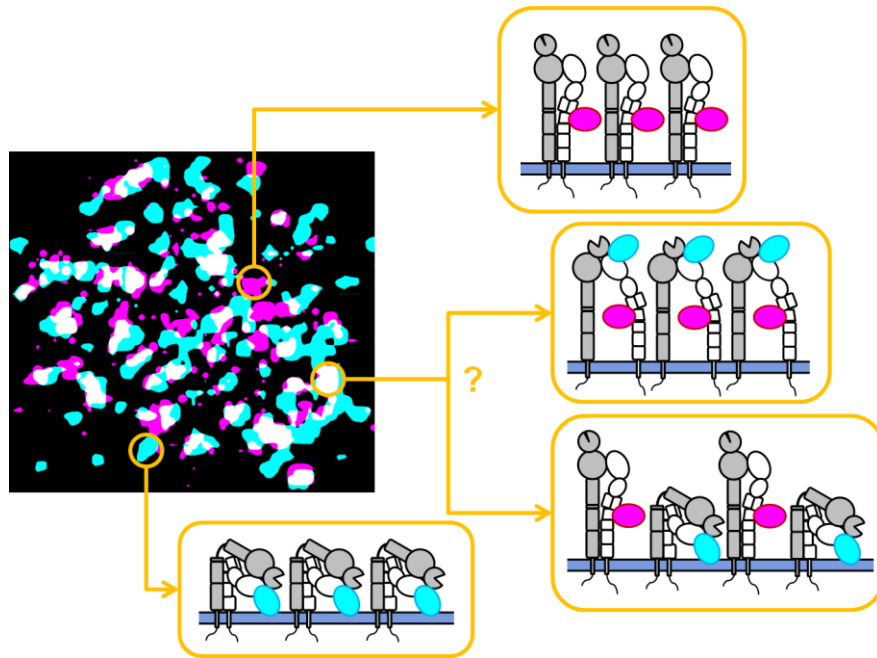

35  
36

37 **Figure S3. TIRF has insufficient resolution to identify true  $E^+H^+$   $\beta_2$  integrin clusters,**

38 **Related to Figure 1**

39 In the binary cluster image of  $\beta_2$  integrin activation on a typical TIRF footprint of an arrested  
40 human neutrophil, a magenta cluster contains mostly  $KIM127^+mAb24^-$  ( $E^+H^-$ , top right), a cyan  
41 cluster contains mostly  $KIM127^-mAb24^+$  ( $E^-H^+$ , bottom left), but when  $KIM127$  and  $mAb24$  are  
42 colocalized in a white cluster, this cluster may contain  $E^+H^+$   $\beta_2$  integrins (middle right) or a  
43 mixture of  $E^+H^-$  and  $E^-H^+$   $\beta_2$  integrins (bottom right).

44  
45

46 Figure S4

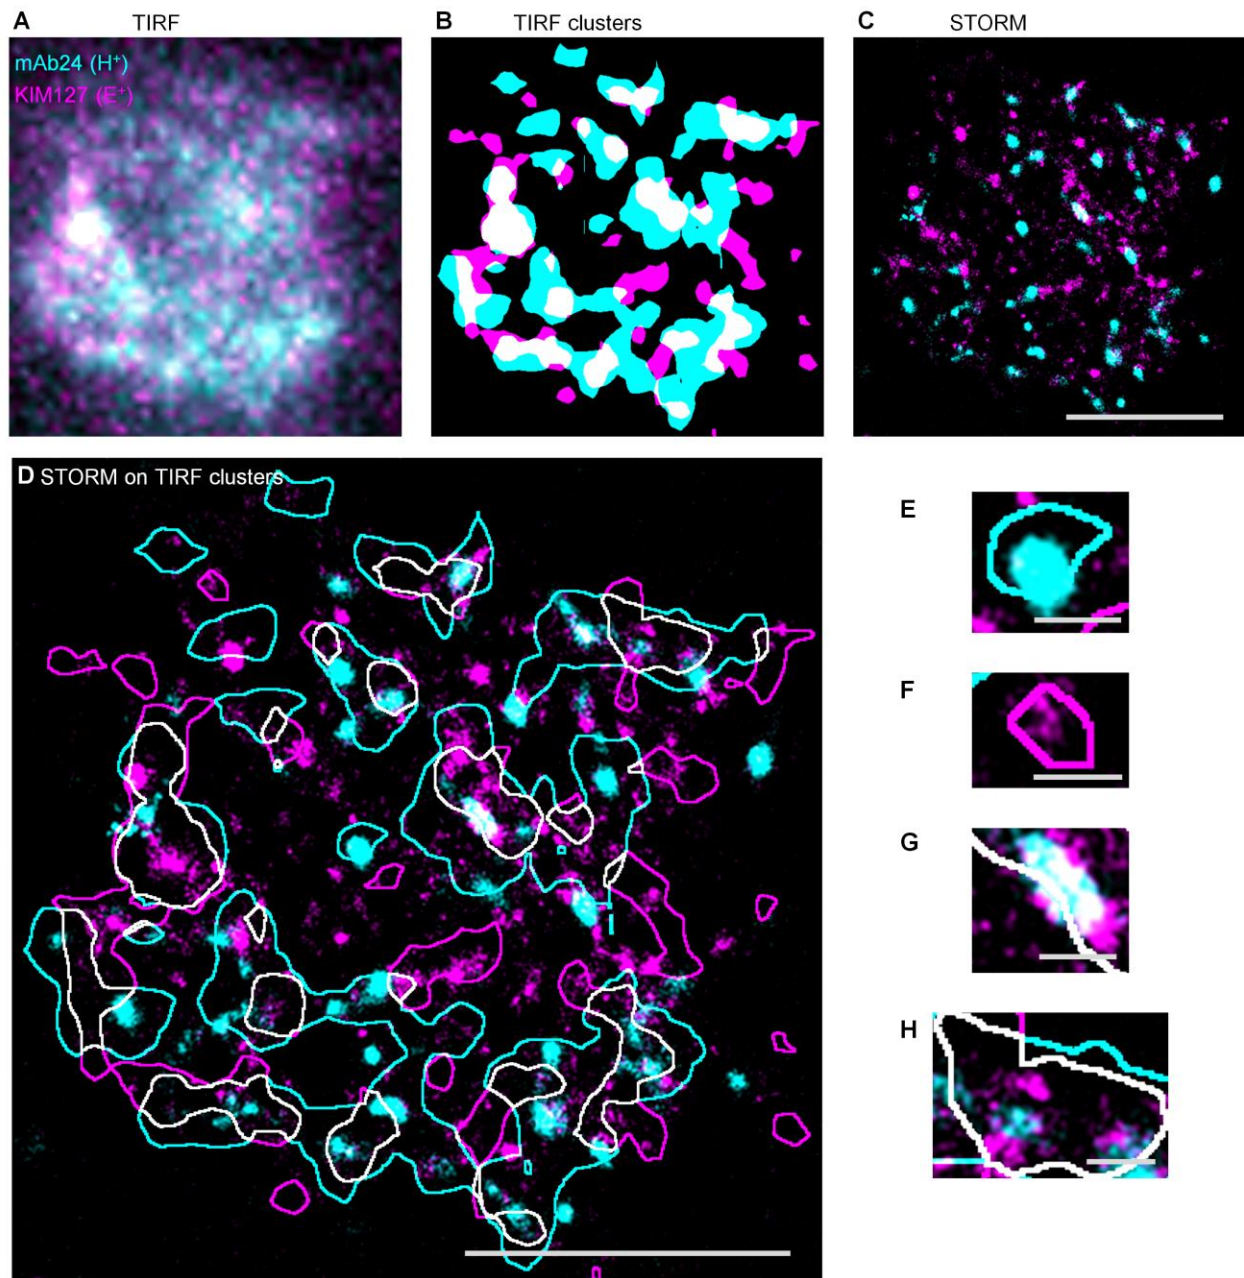

47

48 **Figure S4. Super-resolution STORM imaging of  $\beta_2$  integrin activation on arrested human**  
49 **monocytes, Related to Figure 1**

50 (A) Primary human monocytes rolling on P-selectin and ICAM-1 at a wall shear stress of 6  
51  $\text{dyn}/\text{cm}^2$  were exposed to CCL2 and Fab fragments of the  $\beta_2$  integrin extension reporter KIM127  
52 (E<sup>+</sup>, magenta) and the high-affinity reporter mAb24 (H<sup>+</sup>, cyan), immediately fixed and imaged by

53 TIRF (entire TIRF footprint, raw image shown). (B) Binary image of A using smart segmentation  
54 as in (Fan et al., 2016) (C) STORM buffer was introduced and blinking events were recorded for  
55 10,000 frames per channel over 10 minutes, corrected for stochastic motion and drift as in STAR  
56 Methods to obtain a raw super-resolution STORM image of the footprint of arrested human  
57 monocytes. (D-H) STORM image overlaid with the outlines of binary TIRF clusters (from B).  
58 Zoomed-in examples of  $E^-H^+$  (cyan, E) and  $E^+H^-$  TIRF clusters (magenta, F). Some white  $E^+H^+$   
59 TIRF clusters showed true colocalization of KIM127 and mAb24 in STORM (G, white). H  
60 shows examples of clusters that appeared colocalized in TIRF but were truly composed of  $E^-H^+$   
61 and  $E^+H^-$  areas as revealed by STORM. Scale bars are  $3\ \mu\text{m}$  for A-D, and 300nm for E-H.  
62

63 Figure S5

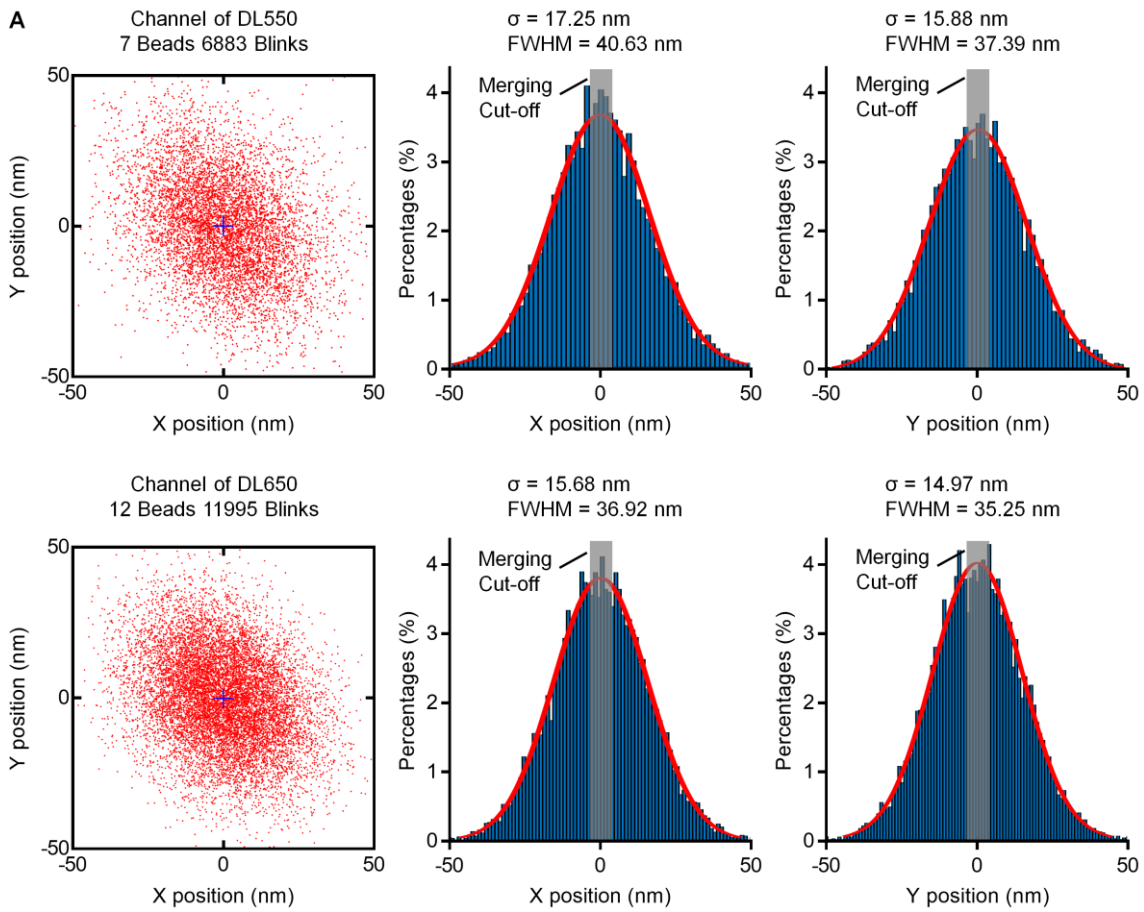

**B** Fluorochromes Fitting center of the blink Gaussians

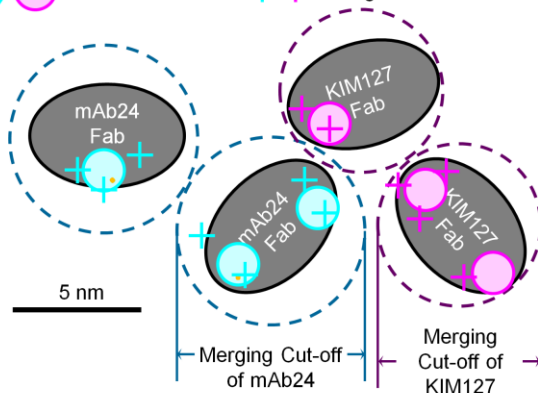

64

65



66 **Figure S5. STORM resolution, Related to Figure 1 and 3**

67 (A) Position as determined by molecular modeling (merging cut-off, grey) overlaid on the  
68 Gaussian of localization accuracy. The resolution of STORM imaging is defined as  $\sigma$  of the  
69 Gaussian. The localization data (left column), X localization accuracy (middle column), and Y  
70 localization accuracy (right column) of the two channels (upper row: DL550 for mAb24; lower  
71 row: DL650 for KIM127). (B) Schematic showing the merging of multiple blinks (crosses) of  
72 individual fluorochromes (circles) and multiple fluorochromes (circles) on the same Fab (grey)  
73 as shown in Fig. 3H-I (random simulation). All multiple blinks, whether from one fluorochrome  
74 or multiple fluorochromes in the same Fab, are merged to represent one Fab.  
75

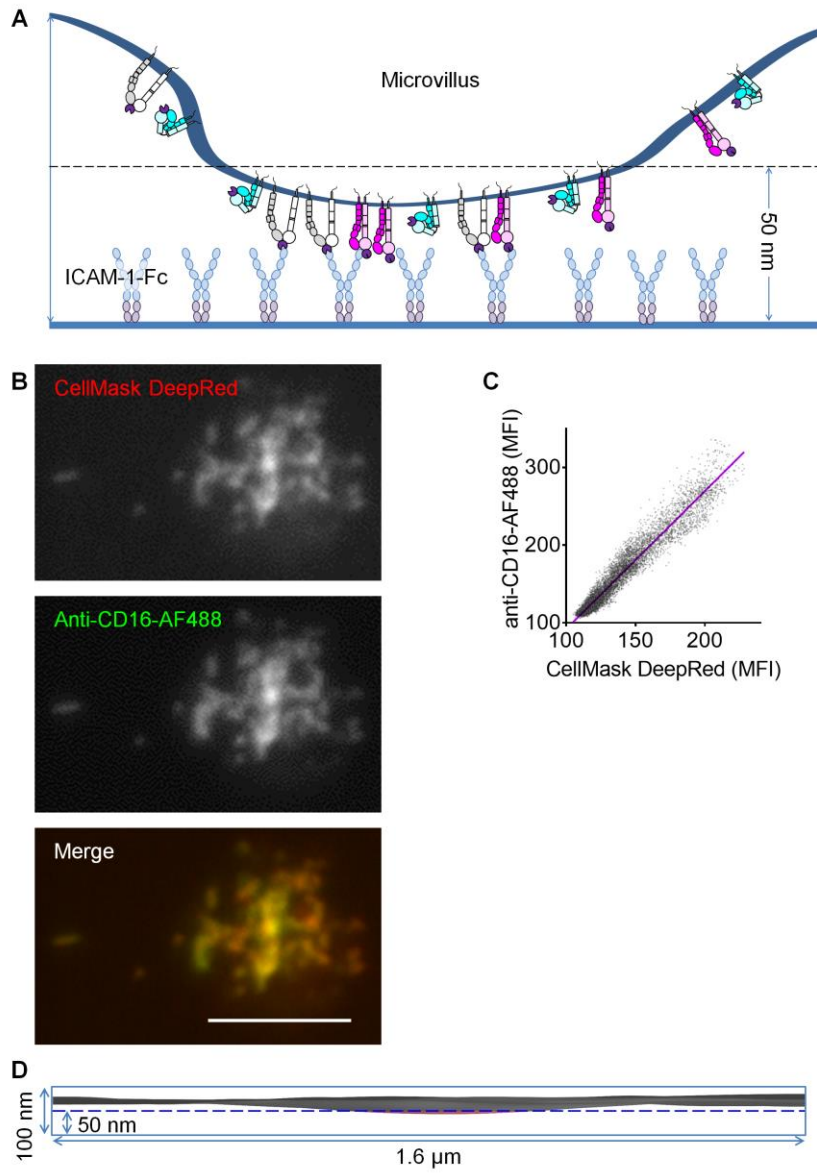

77

78

79

80 **Figure S6. The area within 50 nm of the substrate contains the  $E^+H^+$  integrin molecules that**  
81 **can bind ICAM-1 in trans, Related to Figure 2**

82 (A) Schematics showing  $E^-H^+$  (cyan),  $E^+H^-$  (magenta), and  $E^+H^+$  (white) integrins on a  
83 microvillus of the neutrophil. Only integrins within 50 nm of the substrate can bind the ligand  
84 (human recombinant ICAM-1-Fc) in trans and support neutrophil arrest. The area within 50 nm  
85 of the substrate is at the tip of microvilli and nearly parallel to the substrate. (B) Typical TIRF  
86 images of a neutrophil cell footprint labeled with both the cell membrane dye CellMask  
87 DeepRed (Red) and AF488-conjugated CD16 antibody (Green). The scale bar is 5  $\mu\text{m}$ . (C) The  
88 pixel-to-pixel correlation of the MFI of CellMask DeepRed and AF488-conjugated CD16  
89 antibody. (D) 3D topography of a microvillus with X, Y, and Z at the same scale. Data from a  
90 TIRF image of anti-CD16-AF488. The area within 50 nm of the substrate is highlighted in red.

91

92

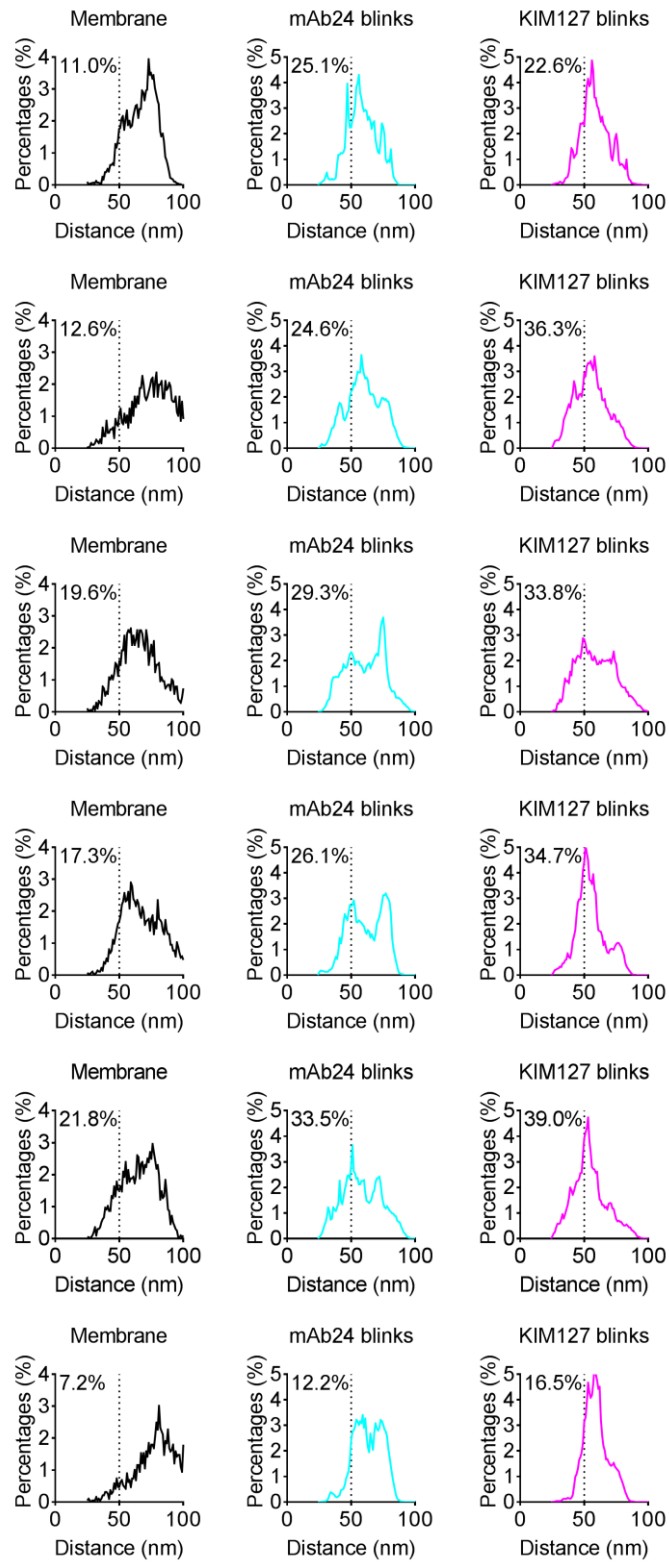

96 **Figure S7. The proportion of cell footprint and integrin activation within 50 nm of the**  
97 **coverslip, Related to Figure 2.**

98 Histograms showing distributions of distances between the neutrophil membrane and the  
99 coverslip (left panels), mAb24 blinks and the coverslip (middle panels), and KIM127 blinks and  
100 the coverslip (right panels) from six cells.

101 Figure S8

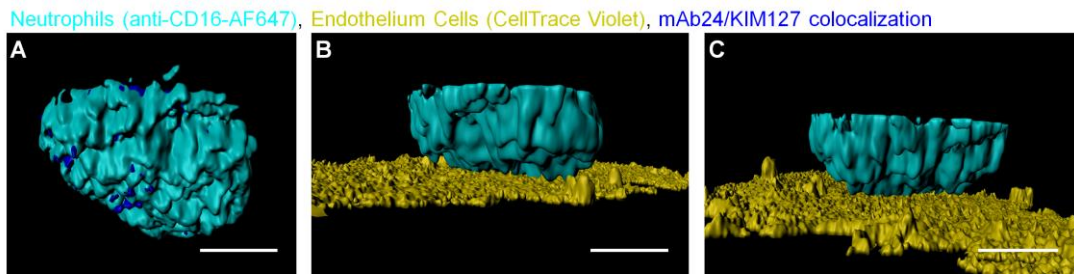

103 **Figure S8. The 3D reconstruction of a neutrophil adhered on endothelial cell monolayers**  
104 **(HUVECs) acquired by the AiryScan confocal imaging, Related to Figure 2.**

105 (A) Bottom view of a neutrophil adhered on endothelial cell monolayers under a shear stress of 2  
106  $\text{dyn cm}^{-2}$ . The arrest is triggered by the perfusion of  $10 \text{ ng ml}^{-1}$  IL-8. The neutrophil surface was  
107 labeled with AF647-conjugated anti-CD16 (cyan). Clusters of  $E^+H^+$  (blue)  $\beta_2$  integrins were  
108 observed. Clusters of  $E^-H^+$  and  $E^+H^-$  were not shown here. (B-C) The side view of the  
109 neutrophil-HUVEC interaction. HUVECs were labeled with CellTrace Violet (yellow). A few  
110 protrusions of HUVECs were observed. Only one or two of them are under the neutrophil and  
111 fill the “valleys” of neutrophil microvilli. Most area of the endothelial surface has no protrusion.  
112

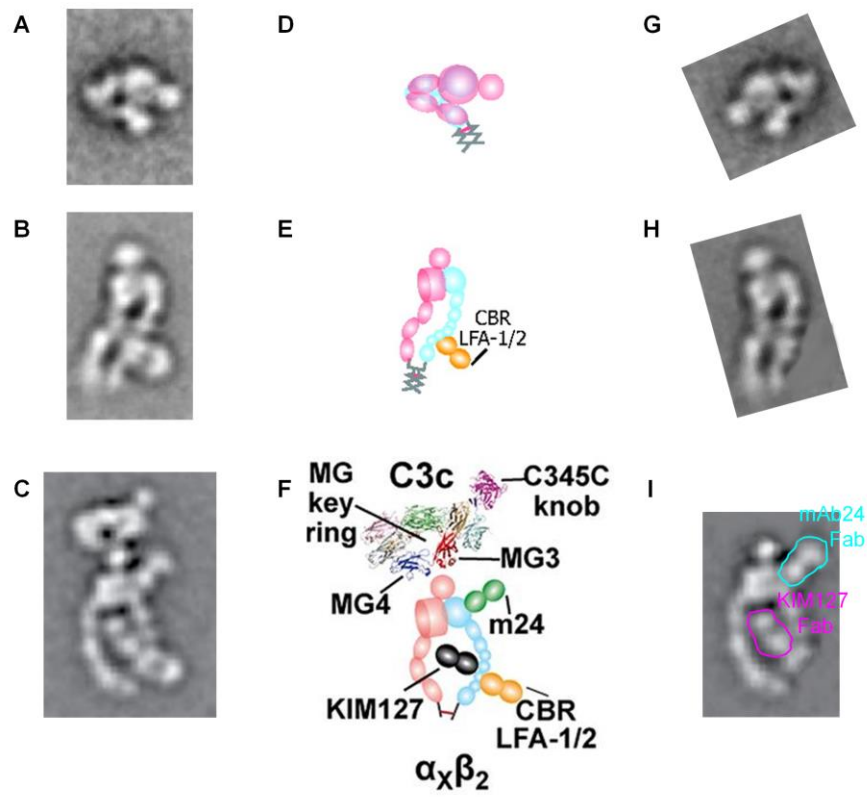

114

115

116 **Figure S9. The modification of EM images in Fig 2, Related to Figure 3**

117 (A-B) EM images of bent ( $E^-$ , A) and extended ( $E^+$ , B)  $\alpha_X\beta_2$  were adopted directly from Fig. 2A  
118 (right panel) and B (left panel) in Chen et al., 2010, respectively. The  $E^+$   $\alpha_X\beta_2$  was bound with  
119 the Fab of monoclonal antibody CBR LFA-1/2. (C) The EM image of extended-open ( $E^+H^+$ )  
120  $\alpha_X\beta_2$  was adopted directly from Fig. 2B (panel 1) in Chen et al., 2012. The  $E^+H^+$   $\alpha_X\beta_2$  was bound  
121 with the ligand C3c, Fabs of monoclonal antibodies mAb24 (m24), KIM127, and CBR LFA-1/2.  
122 (D-F) Schematics of the EM images were shown. D and E were adopted directly from Fig. 2A  
123 and B in Chen et al., 2010, respectively. F was adopted directly from Fig. 2C in Chen et al., 2012.  
124 (G-I) EM images of  $E^-$ ,  $E^+$  and  $E^+H^+$   $\beta_2$  integrins showed in Figure 3B. G was rotated and  
125 flipped horizontally from A. H was rotated from B, and the Fab of CBR LFA-1/2 was  
126 photoshopped out. In I, The ligand C3c and the Fab of CBR LFA-1/2 were photoshopped out  
127 from C. The Fabs of mAb24 and KIM127 were circled by cyan and magenta, and labeled,  
128 respectively.

129

130



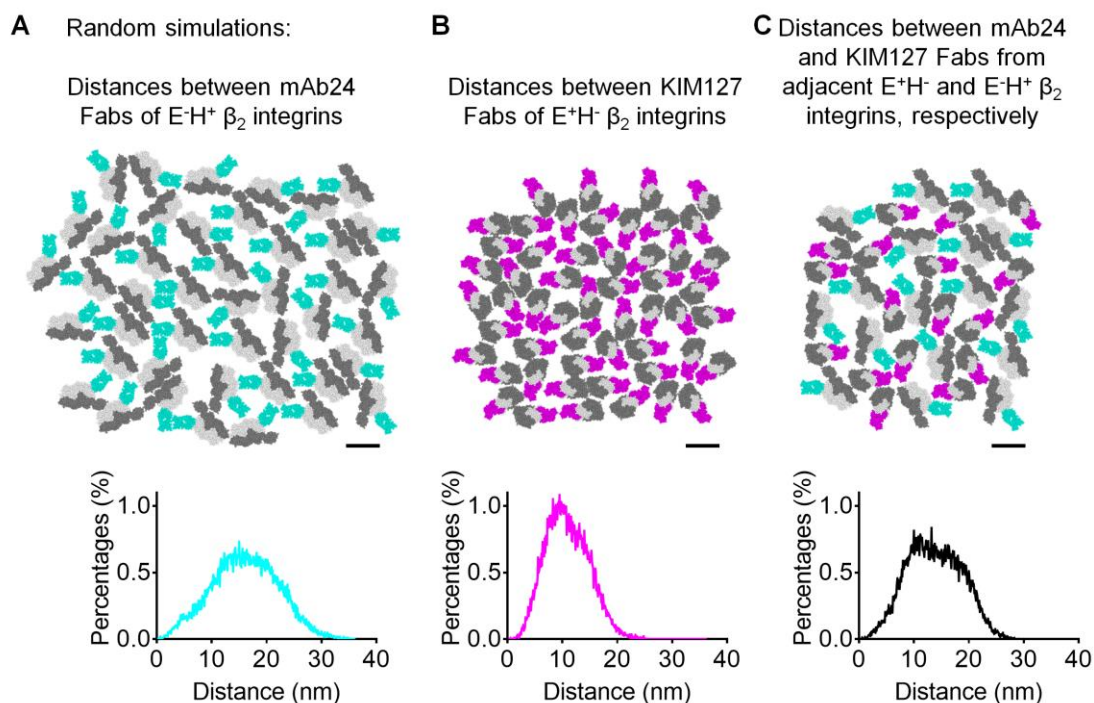

132

133

134 **Figure S10. Random simulation of activated  $\beta_2$  integrins in top view, Related to Figure 3**

135 **and 4**

136 Space-filling top views of E<sup>-</sup>H<sup>+</sup> (A), E<sup>+</sup>H<sup>-</sup> (B)  $\beta_2$  integrins, and the mixture of E<sup>-</sup>H<sup>+</sup> and E<sup>+</sup>H<sup>-</sup> (C)

137  $\beta_2$  integrins with random adjacent directions and orientations. The histograms below show the

138 distribution of distances between two blinks from two mAb24 Fabs in A (cyan curve), two

139 KIM127 Fabs in B (magenta curve), one mAb24 Fab and one KIM127 Fab in C (black curve),

140 respectively. Each histogram contains data from 1,000 space-filling random simulations of 64

141 conditions (8 directions  $\times$  8 orientations). Scale bars are all 10nm.

142

143

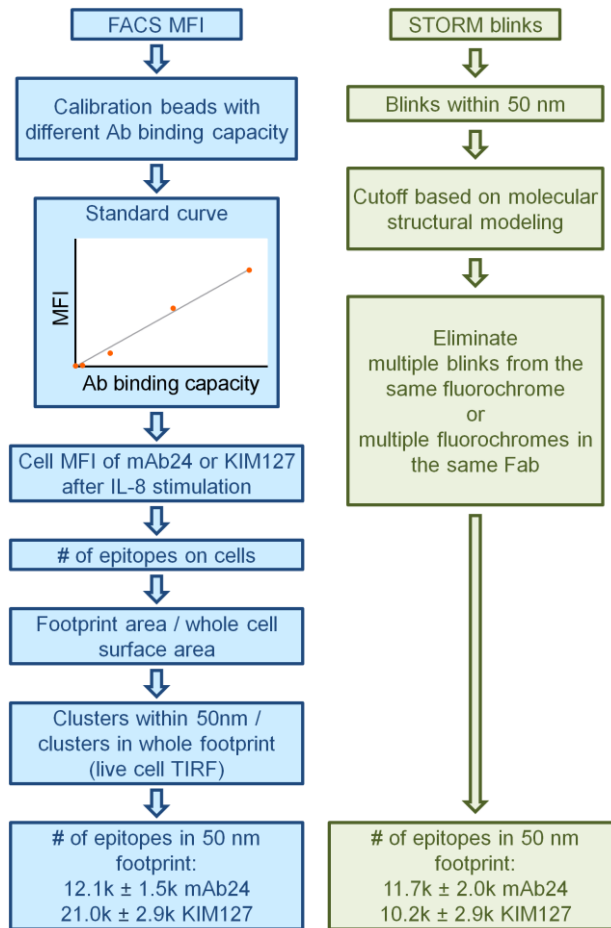

145

146

147

148 **Figure S11. Comparison of the number of activated  $\beta_2$  integrin molecules in footprints of**  
149 **arrested neutrophils based on flow cytometry (MFI, left) or STORM (right), Related to**  
150 **Figure 3**

151 In the flow cytometry assay, calibration beads with five different antibody binding capacities  
152 were used. After incubating with the same antibody used for staining the cells, five different MFI  
153 were obtained. The standard curve correlates MFI with the number of epitopes (exactly one  
154 KIM127 or mAb24 epitope per integrin). MFI of mAb24 and KIM127 were determined on  
155 human neutrophils after IL-8 stimulation, yielding the number of mAb24 and KIM127 epitopes  
156 on the whole cell surface. This is multiplied with the ratio of the footprint area to the whole cell  
157 surface area as estimated by the cell diameter in epifluorescence imaging. This yields the number  
158 of mAb24<sup>+</sup> or KIM127<sup>+</sup>  $\beta_2$  integrin molecules in the footprint. From the TIRF images of live  
159 neutrophils, at the time of arrest, we estimate the percentage of integrins within 50 nm to the  
160 substrate. This yields the number of mAb24<sup>+</sup> or KIM127<sup>+</sup>  $\beta_2$  integrin molecules within 50 nm  
161 to the substrate. In STORM imaging, after filtering out blinks 50 nm away from the substrate,  
162 merging by the cutoff obtained from molecular modeling, the number of mAb24 and KIM127  
163 epitopes is counted in the footprint. Both methods yield comparable numbers of mAb24 and  
164 KIM127 epitopes.

165

166

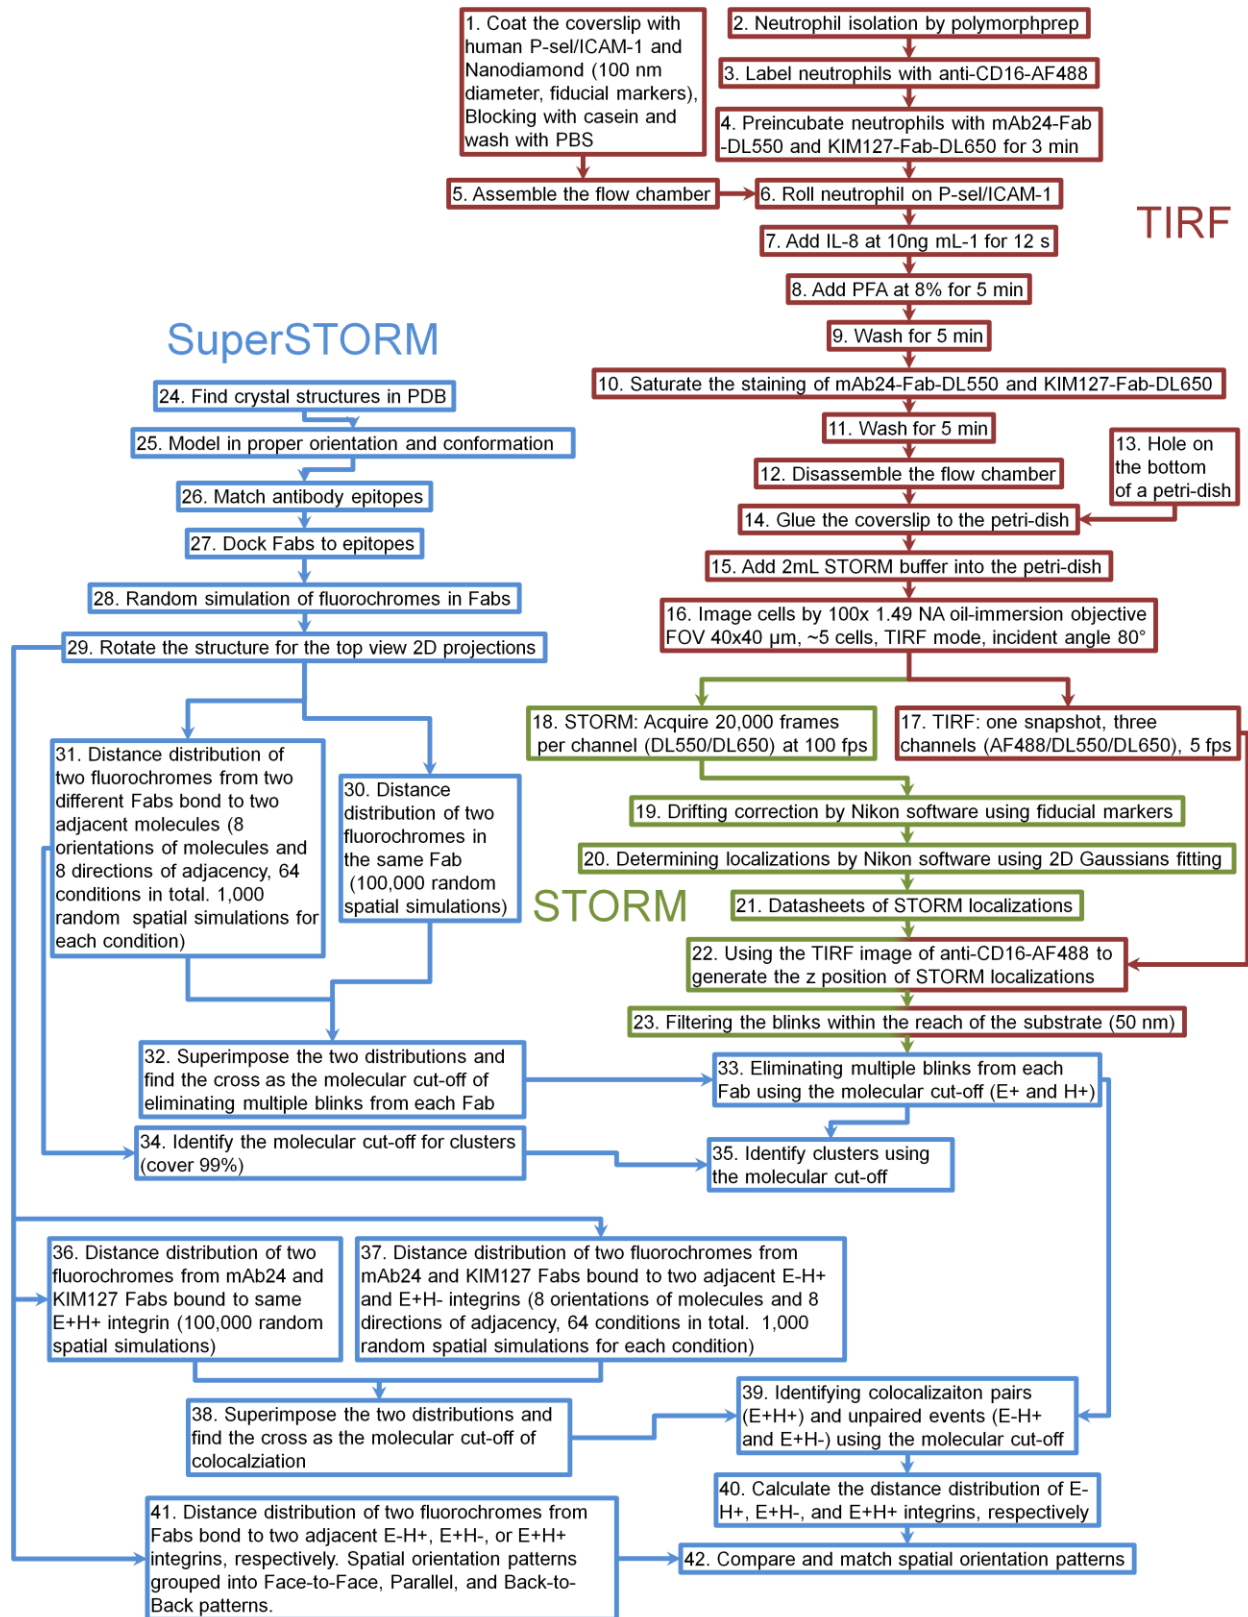

169 **Figure S12. The workflow of experimental and image processing procedures, Related to**

170 **STAR Methods.**

171

172 **Table S1. Colocalization assays of anti-CD16-AF488 and CellMask DeepRed on neutrophils,**

173 **Related to Figure 2**

| Cell # | Linear Correlation R <sup>2</sup> | Person's R value (-0.12 to 1) | Li's ICQ value (-0.5 to 0.5) | Kendall's Tau-b rank correlation value (-1 to 1) | Manders' M1 (0 to 1) | Manders' M2 (0 to 1) | Costes P-Value |
|--------|-----------------------------------|-------------------------------|------------------------------|--------------------------------------------------|----------------------|----------------------|----------------|
| 1      | 0.9445                            | 0.97                          | 0.448                        | 0.7822                                           | 1                    | 1                    | 1              |
| 2      | 0.9534                            | 0.98                          | 0.465                        | 0.7472                                           | 1                    | 1                    | 1              |
| 3      | 0.9297                            | 0.96                          | 0.452                        | 0.7243                                           | 1                    | 1                    | 1              |
| 4      | 0.9281                            | 0.96                          | 0.469                        | 0.7408                                           | 1                    | 1                    | 1              |
| 5      | 0.9488                            | 0.97                          | 0.469                        | 0.7944                                           | 1                    | 1                    | 1              |
| 6      | 0.9282                            | 0.96                          | 0.451                        | 0.8093                                           | 1                    | 1                    | 1              |
| Mean   | 0.9388                            | 0.97                          | 0.459                        | 0.7664                                           | 1                    | 1                    | 1              |
| SD     | 0.0105                            | 0.01                          | 0.009                        | 0.0307                                           | 0                    | 0                    | 0              |

174

175

176 **Table S2. Confidence intervals for the molecular cut-off in random simulations, Related to**

177 **Figure 3**

| Cut-off for:                  | Value<br>(nm) | False Negative Rate | False Positive Rate | Relative<br>Figure |
|-------------------------------|---------------|---------------------|---------------------|--------------------|
| Merging H <sup>+</sup> blinks | 7.3           | 0.93%               | 7.78%               | Fig. 2l            |
| Merging E <sup>+</sup> blinks | 6.1           | 3.19%               | 11.47%              | Fig. 2m            |
| Colocalization                | 8.2           | 6.24%               | 14.36%              | Fig. 3a            |

178

179

180 **Table S3. Number of mAb24 (H<sup>+</sup>) and KIM127 (E<sup>+</sup>) events in each microllus tip within 50**  
 181 **nm of the coverslip, Related to Figure 2-4**

| Number | H <sup>+</sup> | E <sup>+</sup> | E <sup>+</sup> H <sup>+</sup> | Number | H <sup>+</sup> | E <sup>+</sup> | E <sup>+</sup> H <sup>+</sup> |
|--------|----------------|----------------|-------------------------------|--------|----------------|----------------|-------------------------------|
| Cell 1 |                |                |                               |        |                |                |                               |
| 1      | 557            | 324            | 180                           | 21     | 4              | 3              | 0                             |
| 2      | 50             | 36             | 5                             | 22     | 1393           | 1360           | 571                           |
| 3      | 159            | 41             | 32                            | 23     | 183            | 94             | 17                            |
| 4      | 91             | 24             | 5                             | 24     | 66             | 42             | 15                            |
| 5      | 1              | 3              | 0                             | 25     | 1              | 0              | 0                             |
| 6      | 127            | 161            | 21                            | 26     | 95             | 68             | 9                             |
| 7      | 3              | 5              | 0                             | 27     | 40             | 31             | 6                             |
| 8      | 35             | 108            | 16                            | 28     | 31             | 7              | 3                             |
| 9      | 2              | 7              | 0                             | 29     | 480            | 179            | 146                           |
| 10     | 28             | 25             | 10                            | 30     | 34             | 30             | 13                            |
| 11     | 631            | 786            | 319                           | 31     | 2              | 77             | 0                             |
| 12     | 968            | 733            | 419                           | 32     | 51             | 7              | 4                             |
| 13     | 2558           | 2399           | 1323                          | 33     | 37             | 16             | 6                             |
| 14     | 2              | 0              | 0                             | 34     | 12             | 18             | 9                             |
| 15     | 716            | 669            | 263                           | 35     | 0              | 0              | 0                             |
| 16     | 1              | 2              | 0                             | 36     | 28             | 52             | 2                             |



|        |     |     |     |    |      |      |      |
|--------|-----|-----|-----|----|------|------|------|
| 17     | 0   | 2   | 0   | 37 | 27   | 63   | 10   |
| 18     | 29  | 8   | 2   | 38 | 211  | 341  | 179  |
| 19     | 10  | 7   | 1   | 39 | 3    | 5    | 0    |
| 20     | 1   | 3   | 0   | 40 | 3030 | 2493 | 1039 |
| Cell 2 |     |     |     |    |      |      |      |
| 1      | 4   | 18  | 1   | 20 | 1    | 10   | 0    |
| 2      | 136 | 363 | 44  | 21 | 0    | 7    | 0    |
| 3      | 75  | 205 | 25  | 22 | 41   | 144  | 22   |
| 4      | 90  | 143 | 40  | 23 | 35   | 80   | 20   |
| 5      | 16  | 41  | 11  | 24 | 0    | 1    | 0    |
| 6      | 6   | 41  | 4   | 25 | 1295 | 3100 | 632  |
| 7      | 0   | 1   | 0   | 26 | 50   | 150  | 45   |
| 8      | 98  | 318 | 81  | 27 | 43   | 125  | 12   |
| 9      | 5   | 33  | 4   | 28 | 161  | 660  | 75   |
| 10     | 3   | 39  | 2   | 29 | 12   | 58   | 5    |
| 11     | 5   | 31  | 4   | 30 | 6    | 52   | 2    |
| 12     | 19  | 55  | 10  | 31 | 796  | 1645 | 415  |
| 13     | 51  | 102 | 16  | 32 | 414  | 637  | 320  |
| 14     | 27  | 99  | 17  | 33 | 77   | 62   | 29   |
| 15     | 580 | 948 | 270 | 34 | 903  | 3028 | 496  |

|        |         |         |        |         |        |        |        |
|--------|---------|---------|--------|---------|--------|--------|--------|
| 16     | 2       | 15      | 1      | 35      | 1      | 4      | 0      |
| 17     | 18      | 32      | 10     | 36      | 0      | 5      | 0      |
| 18     | 1251    | 2578    | 736    | 37      | 3      | 27     | 0      |
| 19     | 2       | 8       | 0      | 38      | 7951   | 27724  | 6882   |
| Cell 3 |         |         |        |         |        |        |        |
| 1      | 0       | 1       | 0      | 12      | 4      | 36     | 4      |
| 2      | 0       | 1       | 0      | 13      | 87     | 334    | 45     |
| 3      | 0       | 2       | 0      | 14      | 17     | 126    | 5      |
| 4      | 1       | 4       | 0      | 15      | 5      | 16     | 2      |
| 5      | 12      | 116     | 7      | 16      | 0      | 2      | 0      |
| 6      | 18      | 113     | 7      | 17      | 821    | 4439   | 393    |
| 7      | 5       | 4       | 0      | 18      | 22     | 200    | 11     |
| 8      | 1       | 138     | 1      | 19      | 12     | 53     | 6      |
| 9      | 1       | 23      | 0      | 20      | 0      | 2      | 0      |
| 10     | 37      | 37      | 12     | 21      | 46     | 223    | 26     |
| 11     | 273     | 1104    | 94     | 22      | 6444   | 29941  | 2966   |
| n      | 100     | 100     | 100    | Average | 336.80 | 897.33 | 184.35 |
| SD     | 1093.87 | 4064.21 | 762.06 | SEM     | 109.39 | 406.42 | 76.21  |

182

183

184 **Table S4. Comparison of TIRF, STORM, and SuperSTORM in this study, Related to STAR**

185 **Methods**

|            | TIRF                                                    | STORM                                                            | SuperSTORM                                                     |
|------------|---------------------------------------------------------|------------------------------------------------------------------|----------------------------------------------------------------|
| Principle  | Total internal reflective, evanescent wave illumination | TIRF based, STORM buffer, stochastic blinks, 2D Gaussian fitting | molecular modeling and spatial simulation to refine STORM data |
| Detector   | ANDOR IXON3 Ultra DU897 EMCCD camera                    | ANDOR IXON3 Ultra DU897 EMCCD camera                             | ANDOR IXON3 Ultra DU897 EMCCD camera                           |
| Excitation | 488 nm<br>561 nm<br>647 nm                              | 561 nm<br>647 nm                                                 | 561 nm<br>647 nm                                               |
| Emission   | 503-550 nm<br>576-621 nm<br>658-800 nm                  | 576-621 nm<br>658-800 nm                                         | 576-621 nm<br>658-800 nm                                       |
| Resolution | ~300 nm                                                 | ~15 nm                                                           | ~6 nm depending on molecular size                              |

187 **Supplemental Movies**

188

189 **Supplemental Movie 1. Structure of E<sup>H</sup> β<sub>2</sub> integrin with mAb24 Fab bound, Related to**  
190 **Figure 3**

191 E<sup>H</sup> β<sub>2</sub> integrin is from the published crystal structure (PDB: 4NEH). α-chain in grey and  
192 β-chain in white. mAb24 Fab (cyan) is docked to its binding site.

193

194 **Supplemental Movie 2. Structure of E<sup>H</sup> β<sub>2</sub> integrin with KIM127 Fab bound, Related to**  
195 **Figure 3**

196 E<sup>H</sup> β<sub>2</sub> integrin is modeled by unfolding the headpiece of E<sup>H</sup> (PDB: 3K6S) to the extension.  
197 α-chain in grey and β-chain in white. KIM127 Fab (magenta) is docked to its binding site.

198

199 **Supplemental Movie 3. Structure of E<sup>H</sup> β<sub>2</sub> integrin with mAb24 and KIM127 Fabs bound,**  
200 **Related to Figure 3**

201 For the E<sup>H</sup> β<sub>2</sub> integrin modeling, the hybrid domain swing out of E<sup>H</sup> β<sub>2</sub> integrin (PDB: 4NEH)  
202 is superposed with PDB: 3FCU, then the headpiece is unfolded. α-chain in grey and β-chain in  
203 white. mAb24 (cyan) and KIM127 (magenta) Fabs are docked to their binding sites. EM image  
204 of E<sup>H</sup> β<sub>2</sub> integrin with mAb24 and KIM127 Fabs bound (Figure 3B, bottom) is used as a  
205 reference.

206
